# Supplementary material for: Prevalence and genomic characterization of Salmonella isolates from commercial chicken eggs retailed in traditional markets in Ghana
Source: Front Microbiol. 2023 Nov 1;14:1283835. doi: 10.3389/fmicb.2023.1283835 (PMC10646427; doi:10.3389/fmicb.2023.1283835)
Supplement: Supplementary file 1 [file Table_1.XLSX]

## Sheet: Sheet1
snp-dists 0.8.2	Source	Country	Year	G01	G03	G07	G09	G10	G26	Reference	SAL_DB5754AA_AS	SAL_IC1719AA_AS	SAL_NB6558AA_AS	SAL_NB6572AA_AS	SAL_NB7743AA_AS	SAL_NB7938AA_AS	SAL_OC2778AA_AS	SAL_UA1391AA_AS	SAL_XB8623AA_AS	SAL_XB8635AA_AS
G01	Eggshell	Accra	2019	0	4	2	7	122	11	16575	7602	8419	8419	7614	8419	8419	13792	7602	7606	7630
G03	Eggshell	Accra	2019	4	0	3	6	121	10	16611	7623	8440	8440	7635	8440	8440	13846	7623	7622	7653
G07	Eggshell	Accra	2019	2	3	0	5	121	11	16641	7642	8461	8461	7656	8461	8461	13869	7643	7640	7671
G09	Eggshell	Accra	2019	7	6	5	0	119	12	16537	7589	8406	8406	7599	8406	8406	13785	7589	7589	7617
G10	Egg Content	Accra	2019	122	121	121	119	0	121	14554	6747	7459	7459	6750	7459	7459	12230	6725	6747	6749
G26	Eggshell	Kumasi	2019	11	10	11	12	121	0	16568	7616	8430	8430	7628	8430	8430	13818	7616	7613	7641
Reference	ATCC11997			16575	16611	16641	16537	14554	16568	0	13510	14530	14506	13143	14501	14499	14044	14049	13319	13174
SAL_DB5754AA_AS	Livestock	Nigeria	2012	7602	7623	7642	7589	6747	7616	13510	0	1298	1288	241	1289	1288	8405	265	282	235
SAL_IC1719AA_AS	Environment	Benin	2008	8419	8440	8461	8406	7459	8430	14530	1298	0	2	1108	1	0	9395	1219	1238	1252
SAL_NB6558AA_AS	Human	Benin	2008	8419	8440	8461	8406	7459	8430	14506	1288	2	0	1108	1	0	9395	1219	1237	1252
SAL_NB6572AA_AS	Human	Benin	2003	7614	7635	7656	7599	6750	7628	13143	241	1108	1108	0	1109	1108	8360	168	206	228
SAL_NB7743AA_AS	Human	Benin	2008	8419	8440	8461	8406	7459	8430	14501	1289	1	1	1109	0	1	9395	1221	1238	1252
SAL_NB7938AA_AS	Human	Benin	2008	8419	8440	8461	8406	7459	8430	14499	1288	0	0	1108	1	0	9395	1219	1238	1252
SAL_OC2778AA_AS	Human	Gambia	2012	13792	13846	13869	13785	12230	13818	14044	8405	9395	9395	8360	9395	9395	0	8411	8383	8414
SAL_UA1391AA_AS	Environment	Benin	2004	7602	7623	7643	7589	6725	7616	14049	265	1219	1219	168	1221	1219	8411	0	204	217
SAL_XB8623AA_AS	Poultry	Nigeria	2018	7606	7622	7640	7589	6747	7613	13319	282	1238	1237	206	1238	1238	8383	204	0	200
SAL_XB8635AA_AS	Poultry	Nigeria	2018	7630	7653	7671	7617	6749	7641	13174	235	1252	1252	228	1252	1252	8414	217	200	0
