# Supplementary material for: Prevalence and genomic characterization of Salmonella isolates from commercial chicken eggs retailed in traditional markets in Ghana
Source: Front Microbiol. 2023 Nov 1;14:1283835. doi: 10.3389/fmicb.2023.1283835 (PMC10646427; doi:10.3389/fmicb.2023.1283835)
Supplement: Supplementary file 2 [file Table_2.XLSX]

## Sheet: Sheet1
snp-dists 0.8.2	Country	Source	Year	G02	G04	G08	G11	G13	G14	G15	Reference	SAL_DB5711AA_AS	SAL_EC7646AA_AS	SAL_EC7648AA_AS	SAL_LA5844AA_AS	SAL_LA5845AA_AS	SAL_MB8064AA_AS	SAL_MB8772AA_AS	SAL_MB8784AA_AS	SAL_MB8786AA_AS	SAL_MB8794AA_AS	SAL_MB8796AA_AS	SAL_NB4509AA_AS	SAL_NB4532AA_AS	SAL_NB5156AA_AS	SAL_NB5232AA_AS	SAL_NB5240AA_AS	SAL_NB5261AA_AS	SAL_NB5278AA_AS	SAL_NB5318AA_AS	SAL_NB5711AA_AS	SAL_NC8797AA_AS	SAL_NC8798AA_AS	SAL_NC8802AA_AS	SAL_NC8803AA_AS	SAL_OB2442AA_AS	SAL_PB8626AA_AS	SAL_PB8628AA_AS	SAL_TA1127AA_AS	SAL_WB4210AA_AS	SAL_WB4215AA_AS
G02	Accra	Egg Content	2020	0	3	3	2	1	6	0	443	8775	8447	8466	43127	8321	95	129	129	127	127	144	11233	8451	8435	8432	8435	8447	8451	8483	8445	46198	4584	8431	7587	93	128	142	8769	91	130
G04	Accra	Eggshell	2019	3	0	3	3	3	4	3	418	8775	8454	8468	43163	8331	97	132	132	130	130	146	11222	8458	8440	8432	8440	8454	8453	8478	8445	46257	4594	8436	7584	96	130	145	8771	94	131
G08	Accra	Egg Content	2019	3	3	0	2	1	4	3	433	8759	8437	8456	43128	8315	97	127	127	125	126	141	11227	8441	8423	8419	8423	8437	8441	8470	8432	46205	4570	8424	7576	94	125	140	8756	93	128
G11	Accra	Eggshell	2019	2	3	2	0	1	0	1	418	8763	8424	8428	43104	8289	96	131	131	129	129	145	11218	8426	8411	8403	8411	8422	8422	8450	8417	46158	4579	8408	7568	94	129	144	8758	92	131
G13	Accra	Egg Content	2020	1	3	1	1	0	0	0	422	8762	8436	8452	43127	8309	96	130	130	128	128	144	11223	8440	8422	8415	8422	8436	8436	8465	8428	46201	4577	8408	7572	94	128	143	8762	92	130
G14	Tamale	Eggshell	2020	6	4	4	0	0	0	3	422	8787	8461	8481	43134	8336	99	133	133	131	133	149	11245	8466	8448	8444	8448	8462	8465	8492	8458	46205	4582	8438	7596	97	133	146	8776	95	135
G15	Tamale	Eggshell	2020	0	3	3	1	0	3	0	437	8783	8458	8472	43208	8335	98	132	132	130	130	147	11250	8460	8444	8438	8444	8456	8457	8500	8451	46285	4580	8447	7592	96	131	145	8782	94	132
Reference	FDAARGOS_313			443	418	433	418	422	422	437	0	9324	9090	8493	43664	8353	127	357	357	356	373	381	11261	9291	8462	8458	9268	9287	9092	8637	8472	46438	4582	8478	7609	74	364	369	9300	121	373
SAL_DB5711AA_AS	Nigeria	Livestock	2012	8775	8775	8759	8763	8762	8787	8783	9324	0	3077	3077	43291	3078	8794	8795	8786	8793	8793	8804	5917	3077	3079	3075	3079	3078	3077	3080	3076	46124	7450	5290	1626	8790	8793	8808	11	8790	8795
SAL_EC7646AA_AS	Nigeria	Poultry	2018	8447	8454	8437	8424	8436	8461	8458	9090	3077	0	16	43230	166	8464	8465	8464	8463	8463	8475	5865	851	16	10	847	850	2	12	13	46192	7597	5256	1827	8461	8463	8478	3081	8460	8464
SAL_EC7648AA_AS	Nigeria	Poultry	2018	8466	8468	8456	8428	8452	8481	8472	8493	3077	16	0	43252	167	8482	8483	8482	8481	8481	8493	5867	3	0	10	0	4	14	16	2	46208	7612	5275	1833	8479	8481	8496	3082	8478	8482
SAL_LA5844AA_AS	Nigeria	Aquatic Animal	2009	43127	43163	43128	43104	43127	43134	43208	43664	43291	43230	43252	0	43178	43244	43248	43234	43246	43245	43256	43213	43234	43229	43232	43232	43235	43235	43238	43233	46428	42892	42860	43241	43235	43240	43240	43306	43239	43244
SAL_LA5845AA_AS	Nigeria	Food	2009	8321	8331	8315	8289	8309	8336	8335	8353	3078	166	167	43178	0	8343	8344	8343	8342	8342	8349	5865	166	167	162	167	166	164	167	165	46176	7605	5277	1701	8334	8342	8357	3079	8339	8343
SAL_MB8064AA_AS	Senegal	Environment	2013	95	97	97	96	96	99	98	127	8794	8464	8482	43244	8343	0	28	25	26	24	40	11252	8467	8449	8445	8449	8464	8466	8450	8459	46273	4574	8445	7598	22	24	39	8789	16	28
SAL_MB8772AA_AS	Senegal	Environment	2012	129	132	127	131	130	133	132	357	8795	8465	8483	43248	8344	28	0	4	2	2	18	11253	8468	8452	8448	8452	8465	8467	8556	8462	46367	4573	8451	7599	26	2	17	8792	24	4
SAL_MB8784AA_AS	Senegal	Environment	2012	129	132	127	131	130	133	132	357	8786	8464	8482	43234	8343	25	4	0	2	1	16	11252	8467	8451	8447	8451	8464	8466	8554	8461	46364	4574	8447	7598	26	1	16	8783	21	4
SAL_MB8786AA_AS	Senegal	Environment	2012	127	130	125	129	128	131	130	356	8793	8463	8481	43246	8342	26	2	2	0	0	16	11251	8466	8449	8445	8449	8463	8465	8553	8459	46370	4573	8448	7597	24	0	15	8789	22	2
SAL_MB8794AA_AS	Senegal	Environment	2012	127	130	126	129	128	133	130	373	8793	8463	8481	43245	8342	24	2	1	0	0	16	11251	8466	8448	8444	8448	8463	8465	8555	8458	46359	4573	8444	7597	22	1	15	8788	21	2
SAL_MB8796AA_AS	Senegal	Environment	2012	144	146	141	145	144	149	147	381	8804	8475	8493	43256	8349	40	18	16	16	16	0	11263	8478	8462	8458	8462	8475	8477	8568	8472	46374	4586	8458	7609	39	15	30	8802	36	19
SAL_NB4509AA_AS	Nigeria	Human	2018	11233	11222	11227	11218	11223	11245	11250	11261	5917	5865	5867	43213	5865	11252	11253	11252	11251	11251	11263	0	5866	5867	5863	5867	5866	5867	5867	5864	45958	10127	8260	4716	11248	11251	11263	5919	11248	11252
SAL_NB4532AA_AS	Nigeria	Poultry	2018	8451	8458	8441	8426	8440	8466	8460	9291	3077	851	3	43234	166	8467	8468	8467	8466	8466	8478	5866	0	3	9	5	2	849	15	1	46195	7599	5259	1833	8464	8466	8481	3082	8463	8467
SAL_NB5156AA_AS	Nigeria	Poultry	2018	8435	8440	8423	8411	8422	8448	8444	8462	3079	16	0	43229	167	8449	8452	8451	8449	8448	8462	5867	3	0	10	0	5	15	17	2	46183	7587	5259	1829	8446	8450	8463	3083	8445	8449
SAL_NB5232AA_AS	Nigeria	Poultry	2018	8432	8432	8419	8403	8415	8444	8438	8458	3075	10	10	43232	162	8445	8448	8447	8445	8444	8458	5863	9	10	0	10	8	9	12	7	46181	7584	5257	1821	8442	8446	8459	3078	8441	8445
SAL_NB5240AA_AS	Nigeria	Poultry	2018	8435	8440	8423	8411	8422	8448	8444	9268	3079	847	0	43232	167	8449	8452	8451	8449	8448	8462	5867	5	0	10	0	7	846	17	2	46183	7587	5259	1829	8446	8450	8463	3083	8445	8449
SAL_NB5261AA_AS	Nigeria	Poultry	2018	8447	8454	8437	8422	8436	8462	8456	9287	3078	850	4	43235	166	8464	8465	8464	8463	8463	8475	5866	2	5	8	7	0	849	16	1	46196	7599	5260	1831	8461	8463	8478	3083	8460	8464
SAL_NB5278AA_AS	Nigeria	Poultry	2018	8451	8453	8441	8422	8436	8465	8457	9092	3077	2	14	43235	164	8466	8467	8466	8465	8465	8477	5867	849	15	9	846	849	0	12	12	46196	7599	5261	1829	8463	8465	8480	3082	8462	8466
SAL_NB5318AA_AS	Nigeria	Poultry	2018	8483	8478	8470	8450	8465	8492	8500	8637	3080	12	16	43238	167	8450	8556	8554	8553	8555	8568	5867	15	17	12	17	16	12	0	14	46277	7590	5251	1835	8447	8556	8566	3083	8446	8554
SAL_NB5711AA_AS	Nigeria	Poultry	2018	8445	8445	8432	8417	8428	8458	8451	8472	3076	13	2	43233	165	8459	8462	8461	8459	8458	8472	5864	1	2	7	2	1	12	14	0	46193	7597	5258	1824	8456	8460	8473	3080	8455	8459
SAL_NC8797AA_AS	Chad	Human	1974	46198	46257	46205	46158	46201	46205	46285	46438	46124	46192	46208	46428	46176	46273	46367	46364	46370	46359	46374	45958	46195	46183	46181	46183	46196	46196	46277	46193	0	45842	45716	46086	46276	46348	46344	46136	46274	46358
SAL_NC8798AA_AS	Chad	Wild Animal	1965	4584	4594	4570	4579	4577	4582	4580	4582	7450	7597	7612	42892	7605	4574	4573	4574	4573	4573	4586	10127	7599	7587	7584	7587	7599	7599	7590	7597	45842	0	8028	6460	4571	4573	4588	7455	4570	4575
SAL_NC8802AA_AS	Chad	Wild Animal	1966	8431	8436	8424	8408	8408	8438	8447	8478	5290	5256	5275	42860	5277	8445	8451	8447	8448	8444	8458	8260	5259	5259	5257	5259	5260	5261	5251	5258	45716	8028	0	4347	8441	8446	8462	5280	8444	8448
SAL_NC8803AA_AS	Cameroon	Human	1966	7587	7584	7576	7568	7572	7596	7592	7609	1626	1827	1833	43241	1701	7598	7599	7598	7597	7597	7609	4716	1833	1829	1821	1829	1831	1829	1835	1824	46086	6460	4347	0	7595	7597	7612	1629	7594	7598
SAL_OB2442AA_AS	Senegal	Environment	2013	93	96	94	94	94	97	96	74	8790	8461	8479	43235	8334	22	26	26	24	22	39	11248	8464	8446	8442	8446	8461	8463	8447	8456	46276	4571	8441	7595	0	23	37	8785	17	26
SAL_PB8626AA_AS	Senegal	Environment	2012	128	130	125	129	128	133	131	364	8793	8463	8481	43240	8342	24	2	1	0	1	15	11251	8466	8450	8446	8450	8463	8465	8556	8460	46348	4573	8446	7597	23	0	15	8790	21	3
SAL_PB8628AA_AS	Senegal	Environment	2012	142	145	140	144	143	146	145	369	8808	8478	8496	43240	8357	39	17	16	15	15	30	11263	8481	8463	8459	8463	8478	8480	8566	8473	46344	4588	8462	7612	37	15	0	8803	36	17
SAL_TA1127AA_AS	Nigeria	Livestock	2012	8769	8771	8756	8758	8762	8776	8782	9300	11	3081	3082	43306	3079	8789	8792	8783	8789	8788	8802	5919	3082	3083	3078	3083	3083	3082	3083	3080	46136	7455	5280	1629	8785	8790	8803	0	8785	8789
SAL_WB4210AA_AS	Senegal	Environment	2012	91	94	93	92	92	95	94	121	8790	8460	8478	43239	8339	16	24	21	22	21	36	11248	8463	8445	8441	8445	8460	8462	8446	8455	46274	4570	8444	7594	17	21	36	8785	0	24
SAL_WB4215AA_AS	Senegal	Environment	2012	130	131	128	131	130	135	132	373	8795	8464	8482	43244	8343	28	4	4	2	2	19	11252	8467	8449	8445	8449	8464	8466	8554	8459	46358	4575	8448	7598	26	3	17	8789	24	0
