# Supplementary material for: Prevalence and genomic characterization of Salmonella isolates from commercial chicken eggs retailed in traditional markets in Ghana
Source: Front Microbiol. 2023 Nov 1;14:1283835. doi: 10.3389/fmicb.2023.1283835 (PMC10646427; doi:10.3389/fmicb.2023.1283835)
Supplement: Supplementary file 3 [file Table_3.XLSX]

## Sheet: S_enteritidis_dist
snp-dists 0.8.2	Source	Country	Year	ERR1010027	ERR1010028	ERR1010032	ERR1010036	ERR1010059	ERR1010064	ERR1010082	ERR1010101	ERR1010128	ERR1010129	ERR1010141	ERR1010152	ERR1010174	ERR984775	ERR984800	ERR984803	ERR984822	ERR984873	ERR998502	G16	G19	Reference	SRR7072858	SRR7072859	SRR7293287	SRR7293288	SRR7293289	SRR7293290	SRR7293291	SRR7293298
ERR1010027	Blood	Ghana	2010	0	1044	1044	1025	1033	1042	1040	1044	1038	1	1023	1049	1034	1041	1690	1044	44	135	1037	1025	1022	1007	1052	1058	1046	1038	57	694	1040	1037
ERR1010028	Blood	Ghana	2011	1044	0	541	94	91	20	75	114	93	1046	79	19	15	73	1478	24	1047	1090	533	91	92	502	24	31	544	537	1060	994	539	535
ERR1010032	Blood	Ghana	2010	1044	541	0	514	524	536	528	533	527	1042	512	544	528	527	1406	539	1044	1084	67	514	515	259	548	555	47	39	1058	1561	41	33
ERR1010036	Blood	Ghana	2011	1025	94	514	0	78	92	84	87	82	1024	65	99	84	85	1454	94	1025	1066	507	79	79	476	104	111	518	511	1041	971	513	509
ERR1010059	Blood	Ghana	2010	1033	91	524	78	0	87	80	95	53	1032	26	94	80	80	1461	89	1032	1073	516	39	40	488	99	109	529	520	1048	981	522	521
ERR1010064	Blood	Ghana	2010	1042	20	536	92	87	0	70	110	87	1044	75	25	10	71	1473	4	1045	1088	529	87	88	498	30	37	540	533	1058	990	535	531
ERR1010082	Blood	Ghana	2010	1040	75	528	84	80	70	0	103	83	1039	68	78	62	9	1466	73	1040	1081	522	81	82	491	83	90	533	526	1056	986	528	524
ERR1010101	Blood	Ghana	2011	1044	114	533	87	95	110	103	0	100	1043	82	117	103	103	1472	112	1043	1085	525	95	95	494	122	129	535	529	1059	990	531	527
ERR1010128	Blood	Ghana	2008	1038	93	527	82	53	87	83	100	0	1037	41	96	82	83	1465	89	1037	1078	519	51	52	488	101	108	528	522	1053	981	524	521
ERR1010129	Blood	Ghana	2010	1	1046	1042	1024	1032	1044	1039	1043	1037	0	1022	1051	1036	1040	1688	1046	45	136	1035	1024	1024	1005	1054	1060	1047	1036	58	692	1038	1035
ERR1010141	Blood	Ghana	2008	1023	79	512	65	26	75	68	82	41	1022	0	82	68	68	1451	77	1021	1064	504	24	24	473	86	94	514	508	1038	968	510	505
ERR1010152	Blood	Ghana	2012	1049	19	544	99	94	25	78	117	96	1051	82	0	18	78	1481	27	1052	1095	536	94	95	505	27	34	547	540	1065	997	542	538
ERR1010174	Blood	Ghana	2007	1034	15	528	84	80	10	62	103	82	1036	68	18	0	63	1467	13	1037	1080	522	80	81	491	23	30	533	526	1050	983	528	524
ERR984775	Blood	Ghana	2010	1041	73	527	85	80	71	9	103	83	1040	68	78	63	0	1465	73	1041	1082	521	81	82	491	83	90	533	525	1057	986	526	523
ERR984800	Blood	Ghana	2010	1690	1478	1406	1454	1461	1473	1466	1472	1465	1688	1451	1481	1467	1465	0	1475	1692	1743	1398	1458	1455	1287	1482	1490	1408	1398	1704	1664	1401	1401
ERR984803	Blood	Ghana	2011	1044	24	539	94	89	4	73	112	89	1046	77	27	13	73	1475	0	1047	1090	531	89	90	503	32	42	545	535	1060	995	537	536
ERR984822	Blood	Ghana	2011	44	1047	1044	1025	1032	1045	1040	1043	1037	45	1021	1052	1037	1041	1692	1047	0	146	1037	1025	1022	1007	1055	1061	1049	1038	21	695	1040	1037
ERR984873	Blood	Ghana	2011	135	1090	1084	1066	1073	1088	1081	1085	1078	136	1064	1095	1080	1082	1743	1090	146	0	1077	1068	1066	1044	1097	1103	1086	1077	159	746	1079	1075
ERR998502	Blood	Ghana	2011	1037	533	67	507	516	529	522	525	519	1035	504	536	522	521	1398	531	1037	1077	0	507	508	252	541	549	71	63	1052	1554	65	61
G16	Egg content	Ghana	2019	1025	91	514	79	39	87	81	95	51	1024	24	94	80	81	1458	89	1025	1068	507	0	0	482	98	105	515	511	1041	970	513	508
G19	Egg shell	Ghana	2019	1022	92	515	79	40	88	82	95	52	1024	24	95	81	82	1455	90	1022	1066	508	0	0	484	99	106	519	512	1036	969	514	509
Reference	Blood	South Africa:Durban	2013	1007	502	259	476	488	498	491	494	488	1005	473	505	491	491	1287	503	1007	1044	252	482	484	0	510	518	262	255	1021	1519	257	253
SRR7072858	Blood	Ghana	2014	1052	24	548	104	99	30	83	122	101	1054	86	27	23	83	1482	32	1055	1097	541	98	99	510	0	16	552	545	1068	999	547	543
SRR7072859	Poultry meat - Kumasi	Ghana	2015	1058	31	555	111	109	37	90	129	108	1060	94	34	30	90	1490	42	1061	1103	549	105	106	518	16	0	559	552	1073	1005	554	549
SRR7293287	Poultry meat - USA	Ghana	2015	1046	544	47	518	529	540	533	535	528	1047	514	547	533	533	1408	545	1049	1086	71	515	519	262	552	559	0	44	1059	1563	46	42
SRR7293288	Blood	Ghana	2014	1038	537	39	511	520	533	526	529	522	1036	508	540	526	525	1398	535	1038	1077	63	511	512	255	545	552	44	0	1053	1552	32	34
SRR7293289	Blood	Ghana	2014	57	1060	1058	1041	1048	1058	1056	1059	1053	58	1038	1065	1050	1057	1704	1060	21	159	1052	1041	1036	1021	1068	1073	1059	1053	0	708	1055	1052
SRR7293290	Blood	Ghana	2014	694	994	1561	971	981	990	986	990	981	692	968	997	983	986	1664	995	695	746	1554	970	969	1519	999	1005	1563	1552	708	0	1558	1552
SRR7293291	Blood	Ghana	2014	1040	539	41	513	522	535	528	531	524	1038	510	542	528	526	1401	537	1040	1079	65	513	514	257	547	554	46	32	1055	1558	0	36
SRR7293298	Blood	Ghana	2013	1037	535	33	509	521	531	524	527	521	1035	505	538	524	523	1401	536	1037	1075	61	508	509	253	543	549	42	34	1052	1552	36	0
ERR-SRR isolates from Accession PRJNA248792
Reference = CP007507 (BioSample: SAMN02712059)
