# Supplementary material for: Prevalence and genomic characterization of Salmonella isolates from commercial chicken eggs retailed in traditional markets in Ghana
Source: Front Microbiol. 2023 Nov 1;14:1283835. doi: 10.3389/fmicb.2023.1283835 (PMC10646427; doi:10.3389/fmicb.2023.1283835)
Supplement: Supplementary file 4 [file Table_4.XLSX]

## Sheet: Sheet1
snp-dists 0.8.2	G05	G06	G12	G18	G20	G21	G22	G23	Reference
G05	0	42	150	56	22	69	71	115	0
G06	42	0	140	44	14	28	46	134	76
G12	150	140	0	153	135	128	124	166	160
G18	56	44	153	0	32	54	60	111	59
G20	22	14	135	32	0	26	35	79	23
G21	69	28	128	54	26	0	59	99	72
G22	71	46	124	60	35	59	0	92	72
G23	115	134	166	111	79	99	92	0	211
Reference	0	76	160	59	23	72	72	211	0
