# Supplementary material for: Prevalence and genomic characterization of Salmonella isolates from commercial chicken eggs retailed in traditional markets in Ghana
Source: Front Microbiol. 2023 Nov 1;14:1283835. doi: 10.3389/fmicb.2023.1283835 (PMC10646427; doi:10.3389/fmicb.2023.1283835)
Supplement: Supplementary file 5 [file Table_5.XLSX]

## Sheet: Sheet1
Isolate ID	Source	Date	Location	Serovar	SequenceType	Ampicillin	Azithromycin	Cefotaxime	Ceftazidime	Colistin	Gentamicin	Meropenem	Tigecycline		Streptomycin	Kanamycin	Kanamycin	Fosfomycin
G17	Eggshell	2019-04-01	Kumasi market	Ajiobo	951	1	4	0.25	0.5	1	0.5	0.03	0.25					fosA7.2
G01	Eggshell	2019-12-01	Accra market	Chester	1954	1	8	0.25	0.5	2	0.5	0.03	0.5				aph(6)-Id
G03	Eggshell	2019-01-01	Accra market	Chester	1954	1	8	0.25	0.5	2	0.5	0.03	1			aph(3'')-Ib
G07	Eggshell	2019-12-01	Accra market	Chester	1954	1	2	0.25	0.5	2	0.5	0.03	0.5			aph(3'')-Ib	aph(6)-Id
G09	Eggshell	2019-02-01	Accra market	Chester	1954	1	8	0.25	0.5	2	0.5	0.03	1			aph(3'')-Ib	aph(6)-Id
G10	Egg Content	2019-09-01	Accra market	Chester	1954	1	8	0.25	0.5	2	0.5	0.03	0.5			aph(3'')-Ib	aph(6)-Id
G26	Eggshell	2019-10-01	Kumasi market	Chester	1954	1	8	0.25	0.5	2	0.5	0.03	0.5			aph(3'')-Ib	aph(6)-Id
G16	Egg Content	2019-03-01	Kumasi market	Enteritidis	11	1	4	0.25	0.5	8	0.5	0.03	0.5		aadA1	aph(3'')-Ib	aph(6)-Id
G19	Eggshell	2019-03-01	Kumasi market	Enteritidis	11	1	8	0.25	0.5	8	0.5	0.03	0.5		aadA1	aph(3'')-Ib	aph(6)-Id
G02	Egg Content	2020-04-01	Accra market	Hadar	33	1	4	0.25	0.5	1	0.5	0.03	0.25			aph(3'')-Ib	aph(6)-Id
G04	Eggshell	2019-12-01	Accra market	Hadar	33	1	4	0.25	0.5	1	0.5	0.03	0.5			aph(3'')-Ib	aph(6)-Id
G08	Egg Content	2019-10-01	Accra market	Hadar	33	1	4	0.25	0.5	1	0.5	0.03	0.25			aph(3'')-Ib	aph(6)-Id
G11	Eggshell	2019-10-01	Accra market	Hadar	33	1	8	0.25	0.5	1	0.5	0.03	0.25			aph(3'')-Ib	aph(6)-Id
G13	Egg Content	2020-07-01	Accra market	Hadar	33	1	4	0.25	0.5	1	0.5	0.03	0.25			aph(3'')-Ib	aph(6)-Id
G14	Eggshell	2020-07-01	Tamale market	Hadar	33	1	8	0.25	0.5	2	0.5	0.03	0.25			aph(3'')-Ib	aph(6)-Id
G15	Eggshell	2020-02-01	Tamale market	Hadar	33	1	4	0.25	0.5	1	0.5	0.03	0.25			aph(3'')-Ib	aph(6)-Id
G05	Eggshell	2020-08-01	Accra market	I 4:b:-	8938	nd	nd	nd	nd	nd	nd	nd	nd					fosA7.2
G06	Eggshell	2020-04-01	Accra market	I 4:b:-	8938	nd	nd	nd	nd	nd	nd	nd	nd					fosA7.2
G12	Eggshell	2019-12-01	Accra market	I 4:b:-	8938	nd	nd	nd	nd	nd	nd	nd	nd					fosA7.2
G18	Egg Content	2019-11-01	Kumasi market	I 4:b:-	8938	nd	nd	nd	nd	nd	nd	nd	nd					fosA7.2
G20	Eggshell	2019-11-01	Kumasi market	I 4:b:-	8938	nd	nd	nd	nd	nd	nd	nd	nd					fosA7.2
G21	Egg Content	2019-08-01	Kumasi market	I 4:b:-	8938	nd	nd	nd	nd	nd	nd	nd	nd					fosA7.2
G22	Egg Content	2020-07-01	Kumasi market	I 4:b:-	8938	nd	nd	nd	nd	nd	nd	nd	nd					fosA7.2
G23	Eggshell	2020-07-01	Kumasi market	I 4:b:-	8938	nd	nd	nd	nd	nd	nd	nd	nd					fosA7.2
G24	Eggshell	2020-06-01	Kumasi market	I 4:b:-	nd	nd	nd	nd	nd	nd	nd	nd	nd
G25	Egg Content	2020-06-01	Kumasi market	I 4:b:-	nd	nd	nd	nd	nd	nd	nd	nd	nd
MIC values given in mg/L
Resistance indicated by Green Fill
nd = not determined
I 4:b:- isolates not tested by MIC
No WGS data for isolates G24 and G25

## Sheet: Sheet2
Isolate ID
G01			aph(6)-Id			dfrA14			sul2
G02		aph(3'')-Ib	aph(6)-Id	gyrA_S83Y						tet(A)
G03		aph(3'')-Ib							sul2	tet(A)
G04		aph(3'')-Ib	aph(6)-Id	gyrA_S83Y						tet(A)
G05											fosA7.2
G06											fosA7.2
G07		aph(3'')-Ib	aph(6)-Id			dfrA14			sul2	tet(A)
G08		aph(3'')-Ib	aph(6)-Id	gyrA_S83Y						tet(A)
G09		aph(3'')-Ib	aph(6)-Id		qnrB	dfrA14			sul2	tet(A)
G10		aph(3'')-Ib	aph(6)-Id		qnrB19	dfrA14			sul2
G11		aph(3'')-Ib	aph(6)-Id							tet(A)
G12											fosA7.2
G13		aph(3'')-Ib	aph(6)-Id	gyrA_S83Y						tet(A)
G14		aph(3'')-Ib	aph(6)-Id	gyrA_S83Y						tet(A)
G15		aph(3'')-Ib	aph(6)-Id	gyrA_S83Y						tet(A)
G16	aadA1	aph(3'')-Ib	aph(6)-Id	gyrA_D87N	qnrB	dfrA1	catA1	sul1	sul2	tet(A)
G17											fosA7.2
G18											fosA7.2
G19	aadA1	aph(3'')-Ib	aph(6)-Id	gyrA_D87N		dfrA1	catA1	sul1	sul2	tet(A)
G20											fosA7.2
G21											fosA7.2
G22											fosA7.2
G23											fosA7.2
G24
G25
G26		aph(3'')-Ib	aph(6)-Id			dfrA14			sul2	tet(A)
